# Supplementary material
Source: PubMed Central journal article supplement (PMC8158177)
Supplement: NIHMS1696329-supplement-1696329-SupFig1.pdf [file NIHMS1696329-supplement-1696329-SupFig1.pdf]

| Cell Line | Primary Antibody | HRP                                                                                | Colorimetric                                                                        | Merged                                                                               |
|-----------|------------------|------------------------------------------------------------------------------------|-------------------------------------------------------------------------------------|--------------------------------------------------------------------------------------|
| Calu-3    | Spike            | 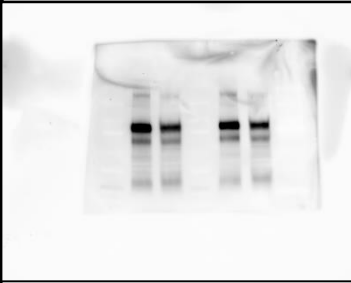  |   |   |
| Calu-3    | Nucleocapsid     |   |   |   |
| Vero      | Spike            |   |   |   |
| Vero      | Nucleocapsid     |  |  |  |
